# Supplementary material for: Immunonutrition Hope? Oncoxin as Cancer Treatment Supplement. Scoping Review
Source: Preprints.org preprint supplement (doi:10.20944/preprints202101.0301.v1), 2021-01-15
Supplement: Supplementary file 1 [file supplementary]

## Sheet: Humans
Author, Year	Country	Design	Population	Intervention	Control	N (intervention:control)	Type of cancer	Outcomes	Outcomes assessment	Follow-up	Variable: mean age				Variable: AFP		Variable: bilirrubin > 2		Variable: bilirrubin > 5		Variable: clinical										Outcome: survival						Outcome:adverse effects	Outcome: adverse effects	Outcome: improvement of appetite	Outcome: feeling well after intake	Radio-Chemotherapy toxicities
											Overall	Oncoxin	Control	p	Oncoxin	Control	Oncoxin	Control	Oncoxin	Control	Ascites		Diffuse HCC		Multiple HCC		Solitary		Hepatic Encephalopathy		1 month		2 months		p	> 6 months		Oncoxin	Oncoxin	Oncoxin	Nausea			Vomiting			Myelosuppression
																					Oncoxin	Control	Oncoxin	Control	Oncoxin	Control	Oncoxin	Control	Oncoxin	Control	Oncoxin	Control	Oncoxin	Control		Oncoxin					Oncoxin	Control	p	Oncoxin	Control	p	Oncoxin	Control	p
Uddin, 2009	Bangladesh	NRCT	Patients with head and throat, breast and uterine cervix cancer	-Group A (22 patients): complex oncological treatment + 25 ml twice a day every 12 hours for one year + chemotherapy -Group B (21 patients): complex oncological treatment + oncoxin solution (without chemotherapy)	Group M: complex oncological treatment with chemotherapy + 25 ml twice a day every 12 hours of placebo	63 (43:20)	Head and throat, breast and uterine cervix cancer	Efficacy in terms of: -Tolerance to oncologic treatment -Survival -Quality of life -Changes in health conditions -Nutritional condition	Karnofsky Index	12 months																										87,65% in experimental group vs 74,68% in placebo		NA
Al-Mahtab, 2015	Bangladesh	NRCT	Patients with End‑stage Hepatocelular carcinoma	OOS 25 ml twice a day for 3 months	Regular care	29 (19:10)	End-stage hepatocellular cancer	-Safety and clinical efficacy -Survival	Bilirrubin and AFP levels, survival	6 months		49.8±12.9 (28‑80)	50.2±12.3 (32‑76)		6113±12327 (5‑50000 ng/ml)	7062.1±14464.8 (3.9‑35000 ng/ml)	8	4	11	6	11	6	5	2	9	6	4	2	6	4	11 (8 died: 5 hepatic failure, 2 multi organ failure, 1 variceal bleeding	5 (5 died: 4 hepatic failure, 1 multi organ failure)	9 (47%) (2 more died: 1 variceal bleeding, 1 hepatic failure)	0 (the rest 5 died: 1 hepatic failure, 1 variceal bleeding followed by shock, 3 multi‑organ failure	<0.0001	21% Oncoxin vs 0% Control		0	6 (32%)	3
Rivas, 2018	Cuba	Phase II RCT	Patients of 18-years-old with a histological diagnosis of head and neck carcinoma, independent of the type or grade of histological differentiation and clinical stage, all requiring concomitant treatment with ionizing radiation (RT) and radiodensities chemotherapy (CT), with compensated intercurrent diseases and a Karnofsky index over 59 and acceptable hematological parameters	RT + QT + Oncoxin-Viusid Oral solution dose=75 ml/day (in three separate doses of 25 ml every 8 hours), 30 days prior to radiation treatment, throughout the entire radiotherapy treatment concomitant with radiosensitising chemotherapy and 30 days following culmination of oncospecific treatment.	RT + QT + Placebo	60 (30:30)	Head and neck carcinoma	-Efficacy and safety	QoL: general questionnaire from the European Organisation for Research and Treatment of Cancer (EORTC) QLQ-C30 Global survival	12 months	60 (45-78)	61(46-77)	60 (33-75)	0.95																						67% Oncoxin vs 63% Placebo (p=0.599)	There are no differences among adverse effects in intervention group vs conservative management	0			2	7	0.071	1	3	0.301	2	5	0.228
Sengupta, 2018	Bangladesh	RCT	Female breast cancer patients receiving radiotherapy as a part of their cancer treatment	RT + 25 ml Oncoxin Oral Solution (OOS) twice daily for 3 months	RT + Conservative management	63 (27:36)	Breast cancer	-General well being -Quality of life	-Karnofsky’s Performance Status (KPS) -Beck’s Depression Inventory-II (BDI-II)	NA
Shumsky, 2019	Russia	RCT	Male and female patients, aged 45‑75 years, with malignant neoplasms and who had been prescribed radiotherapy, chemotherapy or a combination of the two, with an Eastern Cooperative Oncology Group performance status score of ≤3, with grade 2‑3 OM according to the World Health Organization (WHO) Oral Toxicity Scale	RT and/or QT + 25 ml of oncoxin twice daily for 20 days	RT and/or QT + Standard management	15 (10:5)	Malignant neoplasms	-Mean WHO Oral Toxicity Scale grade -Body mass -Days with regular food intake -Days with normal appetite -Adverse events -Common Toxicity Criteria of the National Cancer Institute using the blood, hepatic and infection scales	WHO oral toxicity scale	No follow-up period intended		62.0±7.9	64.0±10.3																									None
Kaidarova, 2019	Russia and Kazakhstan	NRCT	Male and female patients aged 50‑70 years, with gastric cancer IIВ‑IIIС, non‑small cell lung cancer IIВ‑IIIА	XELOX or paclitaxel+carboplatin + 25 ml of oncoxin twice daily for 20 days	XELOX (gastric cancer) or paclitaxel+carboplatin (NSCLC)	133 (84:49)	Gastric cancer and non-small cell lung cancer	-Improvement in QoL -Total Symptom distress score of the Edmonton Symptom Assessment System questionnaire (SDS ESAS), emotional SDS ESAS, physical SDS ESAS scores, separate symptoms of ESAS -Body mass -Serum albumin -Toxicity	-Minimal clinically important difference in SDS ESAS -Common toxicity criteria	No follow-up period intended		59	57.2	0.1																							Seven patients reported ONCX‑related nausea immediately after swallowing with or without vomiting
[truncated: 312 more columns]

## Sheet: Basic
Author, Year	Country	Design	Type of cancer	Outcomes	Mechanisms of action	Comments
Hernandez-Garcia, 2015	Spain	In vitro/In vivo mice	HER2-overexpressing breast cancer	In vitro: -Effect on proliferation of HER2+ Breast Cancer cell lines -Effect on cell cycle progression and apoptosis -Effect in combination with anti-HER2+ treatments (lapatinib or tratuzumab) Mice: -Effect on tumor development -Effect on tumor progression	-Increase in the proportion of cells in the G0/G1 phases of cell cycle, suggesting an arrest in the progression of cells from G1 into S. Treatment with OOS caused an increase in p27, together with decreases in cyclin D1 and pRb. -Stimulation of cell death by increase of annexin V staining, as well as increased staining of DNA in the Sub-G0 region of the propidium iodide histograms, especially at …	In fact, reduced p27 levels and elevated cyclin D1 expression accelerate cell cycle progression through G1 (37). Moreover, genetic studies of p21/cyclin D1 double deficient mice demonstrate that p27 and cyclin D1 cooperate in vivo to regulate cell cycle control (38,39).
Diaz-Rodriguez, 2016	Spain	In vitro/In vivo mice	Acute myeloid leukemia	In vitro: -Effect on proliferation of AML cell lines -Effect in combination with anti-AML treatments Mice: -In vivo efficacy in AML murine models -Effect on circulating cytokines -Cell proliferation and apoptosis -Transcriptional effect	-Tumors treated with OOS exhibited a lower percentage of cells stained with proliferation marker Ki67, pointing to a decrease in cell proliferation. -The analysis of the genes whose expression changed after OOS treatment identified some involved in cell cycle regulation and progression such as CDK15 or RGCC. Decrease in the amount of LIF -Stimulation of the immune system through the production of…	There was no effect of OOS on cell death since no differences on the number of cells stained by TUNEL were observed when compared to tumors from untreated animals. Similarly, no differences on the vascularization marker CD31 were found. It was only when the proliferation marker Ki67 was used to stain the sections when significant differences were found. There were no differences in the CDKs or cy…
Marquez, 2016	Spain	In vitro/In vivo mice	Colorectal cancer metastasis to the liver	In vitro: -Effect on viability of CRC cell lines -Effect on migratory potential of CRC cell lines In vivo: -Effects of administration pattern in OOS efficacy during the development of metastasis to the liver -Dose-dependent effect of OOS in the metastasic development to the liver in vivo -Effect on tumor proliferation and apoptosis -Effect on infiltration of myofibroblasts in the metastatic liver…	-Decrease in the intratumoral expression of Ki-67, an antigen strictly associated with cell proliferation. Decreased viability of tumor cells and a slight reduction in the number of cells in phase S. Increase in the amount of cells in phase G2/M. -OOS breaks the characteristic resistance of tumor cells to enter apoptosis. Increase in cell number in subG1 in vitro and intratumoral increase of casp…	In fact, cathechins and licorice components cause cell cycle arrest by downregulating cyclin D1 and E, key molecules in G1 to S transition and completion of the latter one (22,23). A decrease in COX-2 expression at RNA levels in total liver caused by OOS administration might be related to a reduction in VEGF levels (36).The reduction in IL-1β, and TNFα RNA levels after OOS administration is consi…
Diaz-Rodriguez, 2017	Spain	In vitro/In vivo mice	Hepatocellular carcinoma	In vitro: -Effect on proliferation of HCC cell lines -Effect in combination with anti-HCC treatments -Effect on apoptotic cell death and cell cycle progression Mice: -Effect on tumor models	-In cells synchronized in G1 by a double thymidine block protocol, OOS delayed G1‑S progression. The nocodazole block experiments also indicated that OOS delayed the progression from the M to G1 phase. The action of OOS in HCC appears to involve a delay in cell cycle progression rather than cell cycle arrest. -Antitumoral action when administered to mice carrying xenografted HepG2 cells. The effe…	The present study, using two HCC cell lines, observed that OOS induced a decrease in MTT metabolization, indicative of reduced proliferation in the HCC‑derived cell lines tested. In addition, combinatory studies using OOS and standard of care drugs used in the therapy of HCC indicated that OOS potentiated the effect of sorafenib, one of the principal drugs used to treat advanced‑stage HCC. Mechan…
Hernandez-Unzueta, 2017	Spain	In vitro/In vivo mice	Colorectal cancer metastasis to the liver	-Effect of OOS, irinotecan and the combination of both on the viability of C26 cells in vitro and in vivo -Effect of the combined therapy in the development of CRC metastasis to the liver -Effect of the combined therapy on proliferation and apoptotic markers -Effect of the combined therapy on the macrophage infiltration into tumor foci in vivo -Gene expression levels	-The combined therapy of OOS® and irinotecan reduced Ki67 expression in the metastatic liver tissue and increased caspase‑3 expression -The ratio of proliferative and apoptotic cells was diminished in livers from treated mice respect to those collected from untreated mice, even though the combined treatment did not show a synergistic effect with irinotecan in the in vivo metastatic progression -O…	According to our results, OOS® and irinotecan alone reduced the viability of C26 cells in vitro, which was further reduced when the combined treatment was applied. However, no synergistic effect was observed in vivo when OOS® was administered together with irinotecan. Nevertheless, the overall fitness state of the mice treated with OOS® plus irinotecan showed an improvement according to the Mouse…
Diaz-Rodriguez, 2018	Spain	In vitro/In vivo mice	Small cell lung cancer	In vitro: -Effect on proliferation of SCLC cell lines -Effect in combination with standard care SCLC treatments -Effect on apoptotic cell death and cell cycle progression Mice: -Effect in SCLC murine models -Effect on cell proliferation and apoptosis in vivo -Transcriptional effect	-When tumors were stained with the proliferation marker Ki-67, a reduction in proliferating cells after OOS treatment was observed. In addition, a clear increase in cell death was detected under those same conditions after staining for apoptotic cell death by TUNEL. These results point to a combined pro-apoptotic as well as anti-proliferative action of OOS in the SCLC in vivo models. -OOS induced…	Treatment with OOS resulted in an increase in the G0/G1 population, increasing from 74.8 to 88.5%. Consequently, there was a concomitant decrease in the percentage of cells in the G2/M (from 14.1 to 7.2%) or S phases (from 11.1 to 4.3%) following treatment with OOS (Fig. 3D). The capability of OOS to interfere with DNA synthesis was evaluated using an alternative technique that allows the quantif…
Hernandez-Unzueta, 2019	Spain	In vitro/In vivo mice/Human PAC cell lines	Pancreatic adenocarcinoma	Murine PAC cell lines: -Effect on tumor cell viability and apoptosis stage -Effect in tumor gen expression Mice: -Effect in PAC tumor development -Cytokine levels Human PAC cell lines: -Effect of gemcitabine or paclitaxel alone -Effect in combination with gemcitabine or paclitaxel -Effect on fibroblast CM–induced chemoresistance to paclitaxel and gemcitabine -Reduction of cell viability	-OOS exerted an antioxidative and anti-inflammatory effect and reduced the in vitro viability and invasion of the murine 3T3 fibroblasts (data not shown), demonstrating that OOS exerts an impact not only on tumor cells but also on the stromal components. -OOS slows down 266-6 cell cycle by 30%, therefore blocking in part, tumor cell proliferation. -OOS reduced the level of central proinflammatory…	OOS decreased the viability of the 266-6 murine pancreatic adenocarcinoma cells in vitro and reduced the tumor cell marker expression (SV40 T-antigen) in the pancreas in vivo, pointing out a reduction of tumor development in the pancreas. Besides, OOS also diminished significantly the in vitro viability of the human pancreatic cancer cell lines BxPC-3, Capan-2, CFPAC-1, Panc10.05, HPAF-II, and SW…
Pérez-Peña, 2019	Spain	In vivo mice	Acute myeloid leukemia Small cell lung cancer	-Deregulated genes -Action on the E2F–TFDP transcriptional network -Prognostic relevance of the E2F-TFDP route	-A group of genes were identified as particularly deregulated: those corresponding to cell cycle checkpoints. Functional analyses of genes involved in cell cycle checkpoints finally led to the identification of the E2F–TFDP pathway as the major deregulated route in the action of OOS.	The E2F transcription factors act on promoters of several genes that are important for cell cycle progression [35,36]. E2F interaction with critical regulatory proteins such as the retinoblastoma protein, modulates the transcriptional properties of E2F. The functional transcriptomic analyses identified nine E2F/TFDP genes deregulated by OOS. Additional studies on the expression and importance of …
Hernández-SanMiguel 2019	Spain	In vitro/In vivo mice/Human glioblastoma cell lines	Glioblastoma	-Effect on tumor growth through the modulation of cancer stem cells (CSCs) properties -Capacity to inhibit M2-like macrophage polarization, both in vitro and in the tumor environment -Pretreatment effect on protumoral function of M2 macrophages	-OOS does not have an effect on the overall tumor cell viability, as we had observed in the in vitro assays -There was a significant decrease in stem cell markers (NESTIN or CD44 expression) in response to OOS in vitro and in vivo. OOS inhibited self-renewal capacity of stem cells -OOS did not significantly change the expression of M1 markers (in the absence or in the presence of LPS) -OOS clearl…	OOS could exert its antitumorigenic action, at least in part, through the inhibition of M2 differentiation.
